# Supplementary material for: Exploratory Evaluation of EGFR-Targeted Anti-Tumor Drugs for Lung Cancer Based on Lung-on-a-Chip
Source: MDPI journal article supplement (doi:10.3390/bios12080618), 2022-08-09
Supplement: s1 [file s1]

## Supplementary Material

### Drug evaluation of EGFR-targeted drugs on NCI-H1650 cells (Fluorescence images of cells stained with Calcein-AM)

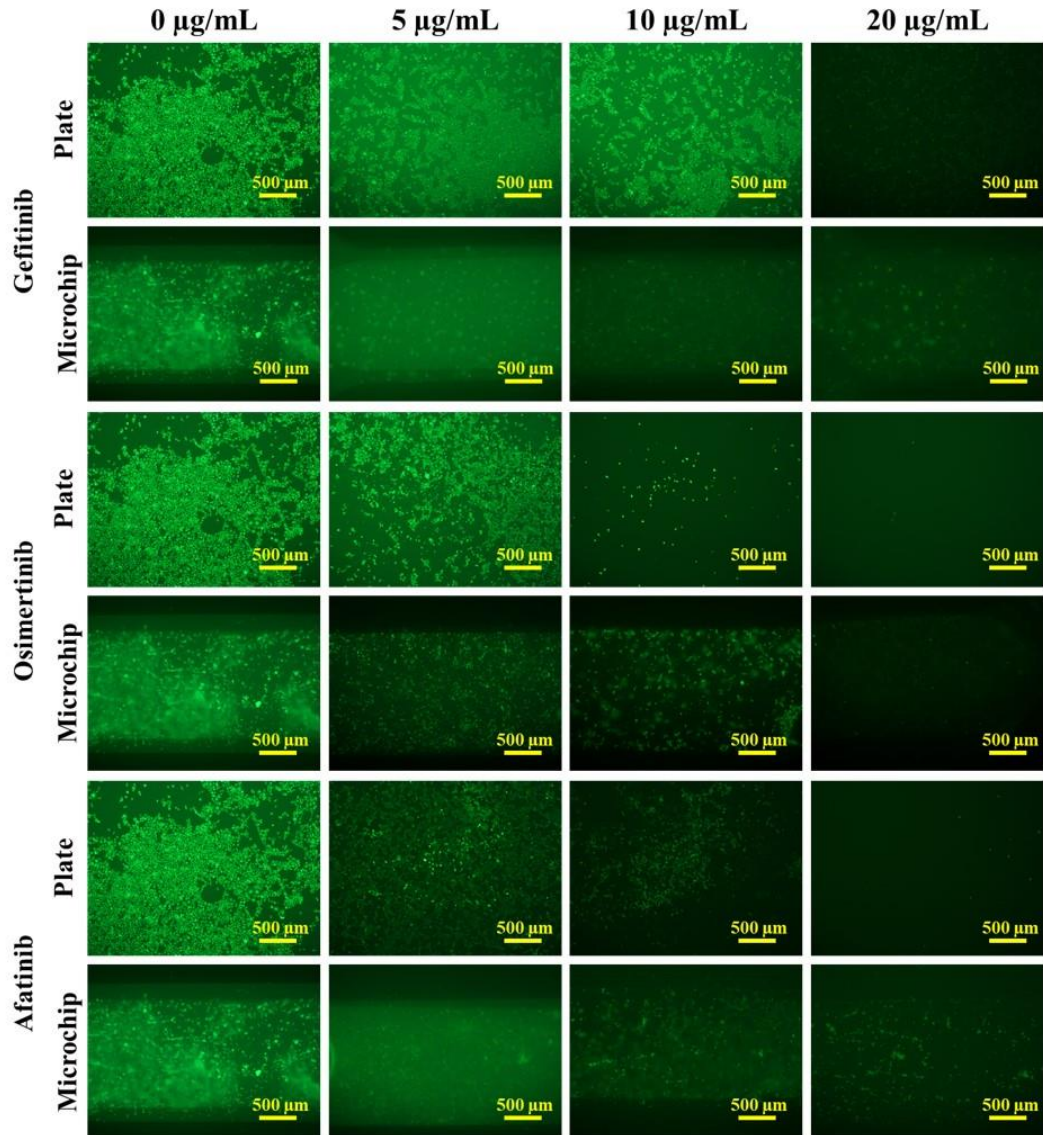

**Figure S1.** Fluorescence images of LCA-1 cells treated with different concentrations of gefitinib, afatinib, and osimertinib for 24 h. Scale bar = 500  $\mu\text{m}$ .
